# Supplementary material
Source: Frontiers journal article supplement (https://www.frontiersin.org/articles/358098)
Supplement: Table_1.XLSX [file Table_1.XLSX]

## Sheet: Sheet1
Table S1: Results of the hysteresis measurements and the Tsunakawa-Shaw paleointensity experiments
Sample ID	NRMLTD,0	Brc/Bc	Mr/Ms	BDS	LTD	1st heating					2nd heating					FLab	F	ΔAIC
	[10-5 Am2/kg]				[%]	Hc	SlopeA1	SlopeN	fN	rN	Hc	SlopeA2	SlopeT	fT	rT	[mT]	[mT]
HA31-04-1	350	1.41382	0.458058	0.725851	-1.21457	12-180	1.193	1.068	0.79	0.999	2-180	1.024	1.007	1.027	0.999	40	42.72	1.75
HA31-05-1	255	1.47751	0.440294	0.707475	1.76817	14-180	1.338	0.916	0.774	0.998	16-180	1.037	1.018	0.668	0.998	40	36.64	21.54
HA31-06-1	658	1.35507	0.440206	0.722071	2.62902	12-180	1.102	1.277	0.738	1	20-180	0.939	1.046	0.571	0.999	40	51.08	9.09
HA31-07-1	241	1.50685	0.433238	0.699686	4.30622	12-180	1.505	1.023	0.902	0.997	24-180	1.076	0.976	0.613	0.998	40	40.92	34.58
HA31-08-1	334	1.4121	0.454676	0.724012	4.30622	35-180	1.106	1.132	0.478	0.999	30-180	0.982	1.009	0.488	0.999	40	45.28	-0.5
HA31-09-1	306	1.52963	0.439681	0.701218	0.596421	10-180	1.257	1.049	0.884	0.997	0-180	1.017	1.04	0.973	0.997	40	41.96	11.86
HA33-01-1	601	1.88893	0.203567	0.453019	11.3475	8-180	0.884	1.192	0.749	0.998	0-180	0.993	1.015	0.99	0.999	60	71.52	0.88
HA33-02-1	437	1.60702	0.228498	0.512271	15.754	5-120	0.869	2.171	0.825	0.999	0-120	1	0.99	1.006	1	30	65.13	-1.7
HA33-03-1	1090	1.54004	0.282246	0.577767	8.00368	10-120	0.973	2.268	0.701	1	0-120	0.989	1.046	0.996	1	30	68.04	6.35
HA33-04-1	1020	1.49517	0.308995	0.607758	9.09091	5-120	0.943	2.291	0.844	0.998	0-120	0.992	1.041	0.995	0.998	30	68.73	-1.34
HA33-06-1	1260	1.48299	0.348114	0.642034	7.74908	22-180	0.978	1.161	0.312	0.997	0-180	0.996	1.021	0.978	0.997	60	69.66	0.33
HA33-07-1	579	2.10797	0.202895	0.433524	14.5299	10-120	0.808	2.392	0.701	1	0-120	0.991	1.012	1.001	1	30	71.76	4.75
HA33-08-1	1380	1.57835	0.286125	0.577372	10.0719	5-120	0.946	1.995	0.87	1	0-120	1.003	1.031	1.001	1	30	59.85	-1.96
HA34-02-2	264	2.09313	0.14592	0.343774	24.4142	15-120	0.921	1.36	0.487	0.997	0-120	0.957	1.009	0.99	1	30	40.8	12.43
HA34-04-2	252	2.09599	0.156389	0.362659	18.8312	6-180	0.908	1.212	0.926	0.995	0-180	0.989	1.032	0.959	0.997	30	36.36	25.65
HA34-05-1	292	1.96065	0.241092	0.493386	17.15	14-180	0.888	1.188	0.595	0.997	0-180	0.956	0.992	0.975	0.999	30	35.64	43.75
HA34-07-1	272	2.38588	0.259819	0.480779	19.3548	6-180	0.899	0.941	0.906	0.997	0-180	0.99	0.955	0.987	0.999	30	28.23	2.64
HA34-09-2	336	1.84809	0.283905	0.548501	13.2697	10-180	0.839	0.994	0.788	0.997	10-180	0.957	0.995	0.968	0.998	30	29.82	-0.43
HA35-01-2	502	1.55172	0.288699	0.582724	9.00819	6-180	0.914	0.992	0.916	0.995	0-180	1.007	0.972	1.018	0.996	30	29.76	4.13
HA35-03-2	259	1.68188	0.211174	0.482806	13.119	5-120	0.919	0.978	0.828	0.999	15-120	0.937	1.043	0.638	0.999	30	29.34	18.45
HA35-05-2	274	2.2707	0.310156	0.53802	22.7799	4-180	0.947	1.007	0.977	0.998	0-180	0.923	0.997	0.987	0.999	30	30.21	16.3
HA35-07-2	198	1.90479	0.337509	0.591101	7.40741	4-180	0.845	1.007	0.907	0.996	0-180	1.031	1.009	0.969	0.998	30	30.21	-1.93
HA36-01-2	462	2.16768	0.220568	0.451836	15.6118	6-180	0.865	1.818	0.909	0.998	0-180	0.985	1.038	0.98	0.998	40	72.72	6.99
HA36-02-2	507	2.03167	0.249547	0.496871	14.2367	6-180	0.9	1.504	0.921	0.999	0-180	1.004	1.022	1.002	0.997	40	60.16	34.03
HA36-05-2	227	2.76594	0.231772	0.424226	17.5598	15-120	1.014	1.418	0.742	0.999	0-120	1.001	1.032	0.965	0.999	30	42.54	22.64
HA36-06-2	316	1.60191	0.30773	0.594947	11.5827	10-180	0.912	1.381	0.865	0.997	0-180	1.016	1.012	1.045	0.998	40	55.24	-1.89
HA36-07-2	604	1.62849	0.274277	0.560407	11.9718	16-180	0.982	1.652	0.769	0.998	16-180	1.013	1.043	0.786	0.999	40	66.08	28.72
HA37-01-1	428	1.37355	0.411717	0.701316	0.0999001	14-180	1.026	0.999	0.747	0.999	0-180	0.954	1.042	1.007	0.999	50	49.95	-1.14
HA37-02-1	291	1.50722	0.434582	0.7005	-4.49321	20-180	1.285	0.879	0.783	0.999	30-180	0.981	1.042	0.659	0.998	50	43.95	16.85
HA37-04-1	265	1.47542	0.411185	0.688842	1.18577	10-180	1.287	0.79	0.82	0.999	0-180	0.978	1.03	1.012	0.998	50	39.5	23.64
HA37-06-1	243	1.49851	0.412701	0.687227	2.53411	10-180	1.336	0.891	0.841	0.998	0-180	0.954	1.036	0.996	0.997	50	44.55	20.17
HA37-08-2	560	1.35619	0.328906	0.641513	2.53411	15-120	1.067	1.937	0.833	1	0-120	0.994	1.017	1.001	1	30	58.11	-1.86
HA38-04-2	749	1.35858	0.422002	0.709981	5.30303	0-180	0.986	1.151	0.975	0.996	0-180	1.021	0.977	1.013	0.995	50	57.55	10.9
HA38-07-1	457	1.56198	0.313058	0.603958	6.97674	14-180	1.053	0.876	0.694	0.995	14-180	0.974	1.013	0.573	0.999	50	43.8	19.32
HA38-08-1	432	1.67957	0.258337	0.538657	9.58409	5-120	0.905	1.579	0.852	1	0-120	1.016	1.012	0.997	1	30	47.37	5.85
HA39-01-1	537	1.69287	0.235385	0.51165	10.7939	0-180	0.863	1.143	0.991	0.999	0-180	1.021	1.017	1.013	0.999	50	57.15	-1.91
HA39-02-2	488	1.73767	0.264186	0.539074	12.1265	5-120	0.871	1.959	0.856	0.999	0-120	1.002	1.023	0.998	1	30	58.77	-1.76
HA39-05-1	756	1.30824	0.437066	0.726052	9.17348	10-180	1.099	0.947	0.561	0.997	18-180	1.039	1	0.451	0.999	50	47.35	9.67
HA39-06-1	972	1.26371	0.425508	0.724524	2.43902	0-180	0.939	1.226	0.982	0.998	0-180	1.012	1.04	1.008	0.998	50	61.3	2.46
HA39-08-1	431	1.77148	0.24269	0.512394	9.42029	18-180	0.893	1.33	0.501	0.997	18-180	1.085	0.957	0.561	0.997	50	66.5	13.06
HA40-02-1	777	1.28609	0.416057	0.715353	3.2882	0-180	0.959	1.073	1.054	0.995	12-180	1.015	1.022	0.68	0.999	40	42.92	16.92
HA40-04-1	770	1.27841	0.456526	0.741979	0.596421	18-180	0.943	1.202	0.476	0.999	20-180	0.982	1.042	0.426	0.999	40	48.08	2.24
HA40-05-1	1170	1.20028	0.49899	0.777199	2.72374	16-180	0.92	1.285	0.652	0.999	14-180	0.998	0.997	0.676	0.999	40	51.4	-0.12
HA40-07-1	532	1.32034	0.404095	0.702853	5.66038	12-180	0.997	1.263	0.593	0.996	0-180	0.995	1.037	0.991	0.999	40	50.52	9.49
HA41-01-1	246	2.24708	0.114599	0.265087	32.3867	12-180	0.962	1.643	0.727	0.995	0-180	0.955	1.003	1.005	1	40	65.72	43.79
HA41-03-1	149	2.96169	0.0806384	0.121347	35.1492	10-180	0.719	2.039	0.629	0.997	0-180	0.978	1.02	1.006	1	40	81.56	20.79
HA41-06-1	427	1.93956	0.185897	0.423487	19.5495	10-180	0.769	1.866	0.516	0.997	0-180	1.096	0.966	0.997	1	30	55.98	6.03
HA41-07-2	484	2.49658	0.184784	0.379068	19.3548	10-120	0.959	1.157	0.632	0.999	5-120	0.99	0.986	0.754	0.997	30	34.71	3.97
HA42-01-1	527	1.7702	0.236449	0.505328	14.1631	16-180	0.861	1.315	0.427	0.999	0-180	1.069	1.027	0.981	0.998	40	52.6	-1.2
HA42-04-1	828	1.66451	0.276619	0.559048	11.6608	4-180	0.761	1.392	0.918	0.999	0-180	1.036	1.015	1.004	0.999	40	55.68	-1.97
HA42-05-1	664	1.94667	0.166922	0.393161	13.4948	5-120	0.974	1.418	0.803	0.999	0-120	1.006	1.026	1.016	1	30	42.54	25.83
HA42-07-1	637	1.86696	0.216276	0.47171	12.4343	6-180	0.992	1.271	0.752	0.999	0-180	1.031	0.969	1.021	0.999	40	50.84	2.51
HA43-01-1	296	1.92557	0.235307	0.489743	11.9718	5-120	0.891	1.202	0.811	0.999	0-120	1.096	0.963	1.036	0.998	30	36.06	3.67
HA43-03-1	214	1.99161	0.264585	0.516387	8.08824	8-180	0.808	1.128	0.584	0.998	0-180	1.015	1.031	1.008	0.999	40	45.12	5.8
HA43-05-1	229	2.02422	0.243149	0.490326	10.2334	10-180	0.738	1.108	0.54	0.999	0-180	1.013	0.994	1.025	0.999	40	44.32	4.22
HA43-08-1	81.8	1.55607	0.317576	0.608554	1.76817	14-180	0.758	0.951	0.472	0.996	20-180	0.893	1.049	0.665	0.998	40	38.04	12.15
HA44-01-1	175	1.66866	0.225189	0.501871	20.8861	12-180	0.999	0.502	0.943	0.998	0-180	0.963	1.028	0.995	1	50	25.1	17.4
HA44-03-1	148	2.50121	0.118593	0.256392	32.7052	0-50	0.684	0.852	0.831	0.995	0-180	0.898	0.99	1.001	1	50	42.6	24.62
HA44-07-2	151	2.37824	0.116077	0.259016	30.6999	10-120	0.931	1.942	0.645	0.995	10-120	0.953	0.964	0.634	1	30	58.26	38.78
HA45-01-1	431	1.49484	0.389697	0.671818	3.56798	0-180	0.976	0.929	1.001	1	24-180	0.984	1.05	0.544	1	50	46.45	26.55
HA45-06-1	220	1.88359	0.318103	0.576658	7.14949	4-180	0.954	0.733	0.896	0.999	0-180	1.018	1.024	1.001	1	50	36.65	21.19
HA45-07-1	369	1.56697	0.229182	0.517371	7.74908	0-180	0.985	0.907	1.005	0.999	22-180	0.956	1.05	0.449	0.999	50	45.35	10.81
HA46-01-1	1000	1.14468	0.53505	0.804484	0.596421	20-180	0.853	1.088	0.521	1	0-180	1.015	0.966	1.049	0.998	40	43.52	2.37
HA46-03-1	231	1.70836	0.272798	0.550805	-4.27529	6-180	1.145	0.86	0.432	0.999	4-180	1.072	1.036	0.583	0.998	40	34.4	14.93
HA46-05-1	463	1.32938	0.31441	0.632458	7.23562	15-120	1.153	1.452	0.747	0.996	15-120	0.976	0.974	0.406	0.997	30	43.56	13.49
HA47-01-1	243	2.33202	0.124519	0.281709	26.4165	10-180	0.882	1.248	0.681	0.997	0-180	0.985	0.996	1.02	0.998	60	74.88	25.42
HA47-02-1	181	2.36622	0.108571	0.24143	26.9006	0-180	0.874	0.842	0.956	0.996	0-180	0.995	0.988	1.001	1	60	50.52	79.05
HA47-03-1	215	2.19863	0.134371	0.312695	25.7058	12-180	0.991	1.095	0.565	0.997	0-180	0.986	1.012	0.983	0.999	50	54.75	62.54
HA47-06-1	187	2.38481	0.11612	0.25865	25.9808	0-180	0.79	1.048	0.956	0.995	0-180	1.002	1.027	0.993	0.999	50	52.4	53.37
HA48-01-1	236	1.92646	0.339074	0.590461	18.6992	6-180	1.297	0.809	0.689	0.998	6-180	1.027	1.009	0.59	0.999	50	40.45	10.88
HA48-02-1	261	2.38331	0.35163	0.564449	10.5546	8-180	1.05	1.02	0.487	0.998	10-180	1.041	0.952	0.527	0.999	50	51	-1.95
HA48-03-1	1470	1.19767	0.535889	0.797252	-0.300903	10-180	1.147	0.921	1.05	0.999	0-180	0.989	1.05	0.978	1	50	46.05	37.33
HA48-05-2	777	1.30777	0.3842	0.690544	3.38164	4-180	1.05	1.058	0.806	0.999	0-180	1.046	1.009	0.99	0.999	50	52.9	-0.63
HA49-01-2	273	2.28841	0.344668	0.565814	8.25688	0-180	1.158	1.022	0.981	0.999	0-180	0.971	1.038	0.99	0.999	40	40.88	-0.09
HA49-03-1	106	1.29956	0.397171	0.700771	2.53411	0-180	1.792	0.625	0.968	0.997	0-180	1.046	0.972	1.021	0.996	40	25	52.89
HA49-04-2	265	1.9744	0.348613	0.593953	11.3475	0-180	1.077	0.989	1.01	0.998	0-180	0.984	1.018	0.987	0.997	40	39.56	42.32
HA49-06-1	248	2.1191	0.323332	0.561202	11.1901	0-180	1.091	1.054	1.019	1	0-180	0.986	1.03	0.978	0.999	40	42.16	52.54
HA49-08-2	277	1.92071	0.284404	0.542456	12.4343	5-120	1.014	1.312	0.976	1	25-120	1.011	1.041	0.628	0.999	30	39.36	4.31
HA50-01-2	690	1.45348	0.32251	0.62436	5.12334	0-180	0.873	0.812	0.906	1	0-180	1.006	1.029	1.012	1	60	48.72	8.8
HA50-02-1	332	2.01552	0.254051	0.503156	11.6608	6-180	0.898	0.909	0.882	0.999	0-180	0.988	1.012	1.012	1	60	54.54	50.36
HA50-03-2	480	2.42207	0.142681	0.312857	21.5071	12-180	0.92	1.086	0.733	0.999	0-180	0.995	0.981	1.005	1	60	65.16	21.14
HA50-06-1	814	2.22297	0.201441	0.422543	17.287	0-120	0.749	1.901	0.976	0.995	0-120	1.009	1.009	0.988	1	30	57.03	16.88
HA50-08-1	681	2.36632	0.203134	0.414266	17.8307	0-90	0.773	1.073	0.75	0.997	45-180	1.001	1.004	0.409	0.996	60	64.38	40.95
HA51-02-2	101	1.69272	0.364343	0.632201	4.12272	8-180	1.52	0.988	0.969	0.995	20-180	0.916	1.048	0.559	0.998	60	59.28	23.25
HA51-03-2	288	1.35503	0.296095	0.612661	6.62932	6-180	1.063	1.016	0.388	0.995	0-180	1.137	0.982	1.023	0.999	60	60.96	-1.28
HA51-07-2	1040	1.19705	0.393873	0.712388	1.86457	10-120	0.969	1.897	0.694	0.999	0-120	1.036	0.993	1.011	1	30	56.91	2.96
HA52-01-1	1190	1.1301	0.565525	0.821939	0.497512	16-180	1.026	1.031	0.813	0.999	0-180	0.973	1.035	1.001	1	50	51.55	8.56
HA52-02-2	982	1.13382	0.562373	0.81984	-2.98661	16-180	0.858	1.085	0.581	0.998	0-180	1.045	1	1.055	0.998	50	54.25	47.73
HA52-05-1	1280	1.12932	0.581584	0.829781	-0.908174	0-180	0.937	0.968	0.985	1	0-180	0.967	1.041	0.969	0.999	50	48.4	-1.07
HA52-07-1	1260	1.14868	0.521644	0.796892	-0.908174	8-180	1.102	0.965	0.969	0.999	0-180	1.002	1.006	0.976	0.999	50	48.25	5.41
HA53-01-1	385	1.96717	0.218301	0.465426	17.287	0-180	0.771	0.962	1.008	0.999	0-180	0.995	1.038	0.992	1	40	38.48	7.24
HA53-05-1	422	1.66518	0.264471	0.546589	9.00819	10-180	1.1	0.651	0.799	0.999	0-180	0.992	1.025	0.995	0.999	40	26.04	35.45
HA53-06-1	496	1.67106	0.251866	0.532518	7.6639	0-180	0.917	0.944	0.987	0.999	0-180	0.992	1.013	0.996	1	40	37.76	-1.72
HA53-07-1	423	1.62233	0.22175	0.502394	15.2542	8-180	0.965	0.935	0.929	0.999	0-180	0.983	1.022	0.988	1	40	37.4	21.74
HA54-03-2	331	1.86747	0.238722	0.498908	4.85252	8-180	0.929	1.637	0.509	0.998	2-180	1.094	0.993	0.916	0.997	40	65.48	-0.91
HA54-06-2	248	1.64717	0.268072	0.552161	2.62902	4-180	0.748	1.111	0.619	0.998	12-180	1.123	0.955	0.394	0.999	40	44.44	-1.74
HA55-02-1	469	1.22737	0.518315	0.783902	-0.200401	0-180	0.819	1.015	0.988	0.999	0-180	1.122	1.036	1.019	0.997	30	30.45	27.31
HA55-03-1	499	1.25221	0.405584	0.712841	2.62902	10-120	0.875	0.911	0.822	1	25-120	0.947	1.048	0.467	0.998	30	27.33	14.32
HA55-05-2	469	1.22737	0.518315	0.783902	-4.16667	8-180	0.788	0.965	0.867	0.999	0-180	1.223	1.045	1.01	0.998	30	28.95	4.24
HA55-08-1	492	1.23725	0.484533	0.763949	3.38164	12-180	0.788	0.984	0.631	0.996	0-180	1.043	1.019	1.003	0.998	30	29.52	-1.91
HA56-04-2	313	1.61032	0.237128	0.522153	13.4948	10-120	0.978	1.474	0.949	0.999	15-120	1.001	1.045	0.763	1	30	44.22	-1.73
HA56-05-1	264	1.735	0.322816	0.594634	13.5696	0-180	1.007	0.918	1.042	0.997	0-180	0.979	1.033	0.97	0.998	40	36.72	30.9
HA56-06-1	347	1.53381	0.321336	0.614242	10.2334	20-180	0.948	0.877	0.866	0.999	24-180	1.1	1.014	0.805	0.999	40	35.08	-1.03
HA56-08-1	281	1.74715	0.249876	0.522787	9.2559	0-180	0.917	1.069	0.982	0.998	0-180	1.031	1.024	1.001	1	40	42.76	53.72
HA57-01-1	409	1.78225	0.282539	0.553314	10.7143	0-180	0.953	1.791	0.45	0.999	16-180	0.999	1.021	0.674	0.999	30	53.73	21.01
HA57-03-1	295	2.07234	0.324274	0.565784	12.892	20-180	0.991	1.201	0.8	0.996	40-180	1.095	0.983	0.403	0.997	30	36.03	-1.34
HA57-04-1	397	1.80262	0.303012	0.570691	12.5109	0-180	1.072	1.467	1.042	0.998	28-180	1.002	1.05	0.532	0.999	30	44.01	62.07
HA57-08-2	250	2.36536	0.159546	0.347695	22.3602	10-120	0.799	1.022	0.618	0.999	10-120	0.952	0.958	0.712	0.999	30	30.66	2.37
HA58-01-2	364	1.3358	0.472417	0.743982	0.497512	18-180	1.245	1.016	0.681	0.999	16-180	0.876	1.008	0.591	1	40	40.64	5.67
HA58-02-1	584	1.28832	0.500963	0.766299	0.497512	0-180	1.164	1.065	0.977	0.998	0-180	0.959	0.993	0.963	0.996	40	42.6	13.76
HA58-08-2	834				0.199601	10-120	1.242	1.275	1.017	0.999	0-120	0.986	1.037	0.966	0.999	30	38.25	37.57
HA58-09-1	1350	1.14378	0.562773	0.818555	-0.806452	0-180	1.02	1.019	1	1	0-180	0.963	0.952	1.041	0.998	40	40.76	27.88
HA59-01-2	222	2.18821	0.256492	0.491872	10.7939	6-180	0.942	0.992	0.69	1	0-180	0.962	0.969	1.02	0.999	30	29.76	-1.37
HA59-03-2	292	2.58714	0.320283	0.524787	9.17348	6-180	1.03	1.214	0.779	0.998	0-180	0.945	0.996	0.988	0.999	30	36.42	40.12
HA59-05-1	336	2.48667	0.289615	0.503726	7.74908	10-180	1.018	1.071	0.611	0.999	0-180	0.974	0.971	0.979	0.999	30	32.13	40.12
HA59-07-2	245	2.04289	0.19004	0.420775	17.0124	5-120	0.943	1.022	0.718	1	10-120	0.953	0.964	0.611	1	30	30.66	1.58
HA59-09-2	171	1.41829	0.302555	0.610889	2.81827	8-180	0.71	1.051	0.458	0.995	0-180	0.997	0.967	1.056	0.996	30	31.53	68.04
HA60-03-2	1080	2.01564	0.356965	0.596984	2.62902	8-180	1.021	1.239	0.92	1	0-180	0.906	1.001	1.009	0.998	30	37.17	20.6
HA60-06-1	719	1.70754	0.238994	0.514386	4.30622	2-180	0.985	1.226	0.96	1	0-180	1.015	0.987	0.995	1	30	36.78	-1.88
HA61-01-2	951	1.15531	0.555166	0.813101	-0.200401	28-180	0.977	0.991	0.877	0.999	0-180	1.004	1.007	0.991	1	40	39.64	15.87
HA61-04-2	1020	1.17159	0.498582	0.781071	0.199601	10-180	0.902	1.079	0.835	0.999	0-180	1.042	1.004	1.01	0.999	40	43.16	-1.59
HA61-05-2	982	1.14562	0.515694	0.794179	1.76817	0-180	0.9	0.91	0.986	0.999	0-180	1	1.011	1.019	0.998	40	36.4	7.28
HA61-09-2	1190	1.19474	0.568979	0.814197	-1.21457	0-180	0.958	0.978	1.007	0.999	0-180	0.984	1.023	0.998	0.999	40	39.12	27.19
HA62-06-2	1140	2.30048	0.301357	0.527872	8.6758	10-120	1.062	1.255	0.688	1	0-120	0.982	1.035	1.002	1	30	37.65	23.65
HA63-01-1	283	1.36459	0.350658	0.658135	-2.45902	25-120	0.604	0.627	0.347	0.999	0-120	0.921	1.034	0.423	0.999	30	18.81	11.51
HA63-05-3	344	1.23962	0.466613	0.753228	-0.603622	15-120	1.072	0.68	0.81	0.996	0-120	1.07	0.994	0.986	0.998	20	13.6	32.4
HA65-03-1	454	1.63705	0.223586	0.503139	10.6345	10-120	0.99	1.371	0.671	1	0-120	0.993	1.013	0.997	1	30	41.13	-1.81
HA65-04-1	441	1.66625	0.251896	0.533039	8.59232	0-180	0.752	1.064	0.995	0.998	0-180	1.132	1.023	0.974	0.995	40	42.56	9.48
HA65-05-1	513	1.52529	0.300786	0.596951	6.19137	0-180	0.819	0.988	0.996	0.996	0-180	1.139	1.001	1.007	0.997	40	39.52	7.13
HA65-06-1	403	1.71258	0.204591	0.471003	16.9435	12-180	0.937	1.211	0.673	0.999	0-180	0.976	1.002	1.015	1	40	48.44	16.61
HA66-03-1	325	1.33251	0.390476	0.691841	6.62932	10-180	0.782	0.932	0.578	0.995	0-180	1.103	0.989	0.982	0.999	20	18.64	4.24
HA66-04-1	376	1.3137	0.436006	0.724677	3.19458	2-180	0.916	0.978	1.006	0.999	2-180	1.039	1.014	0.957	0.999	20	19.56	15.98
HA66-06-1	367	1.30586	0.377833	0.68618	7.57856	15-120	0.844	0.467	0.571	0.998	35-120	0.861	1.049	0.351	0.999	30	14.01	-1.94
HA66-07-1	367	1.53569	0.202983	0.487292	6.01504	4-180	0.924	0.749	0.989	0.999	0-180	1.033	1.005	0.974	0.999	20	14.98	19.21
HA66-08-1	387	1.3167	0.445973	0.730528	4.48902	12-180	0.794	0.831	0.661	0.996	0-180	1.05	1.018	0.965	0.999	20	16.62	11.35
NRMLTD,0 initial NRM intensity after LTD
Brc/Bc, Mrs/Ms, ratios of coercivity of remanence (Brc) to coercive force (Bc) and saturation remanent magnetization (Mrs) to saturation magnetization (Ms)
BDS, bulk domain stability calculated from hysteresis rations (Paterson et al., 2017)
LTD, LT demagnetized fraction of ARM0
Hc, the coercivity interval taken for the linear segments
slopeA1, slopeA2, slopes of ARM spectra for Hc in the ARM0-ARM1 and ARM1-ARM2 diagrams
slopeN, slopeT, slopes of the linear segments in the NRM-TRM1* and TRM1-TRM2* diagrams
fN, fT, NRM and TRM1 fractions of the linear NRM-TRM1* and TRM1-TRM2* segments
rN, rT, correlation coefficients of the linear NRM-TRM1* and TRM1-TRM2* segments
FLab, laboratory DC field to impart TRM1 and TRM2
F, calculated paleointensity
ΔAIC, AIC difference between linear and quadratic fit (Yamamoto and Tsunakawa, 2005)
